# Supplementary material for: TGF-β1 induces CREB1-mediated miR-1290 upregulation to antagonize lung fibrosis via Napsin A
Source: PubMed Central journal article supplement — Int J Mol Med. 2020 Apr 3;46(1):141–8. doi: 10.3892/ijmm.2020.4565 (PMC7255477; doi:10.3892/ijmm.2020.4565), 2020-04-03
Supplement: Supplementary_Data.pdf [file Supplementary_Data.pdf]

Figure S1. Expression of miRNAs in blood samples obtained from healthy volunteers (negative control) and patients with pulmonary fibrosis. \*P<0.05, \*\*P<0.01, compared to NC group.

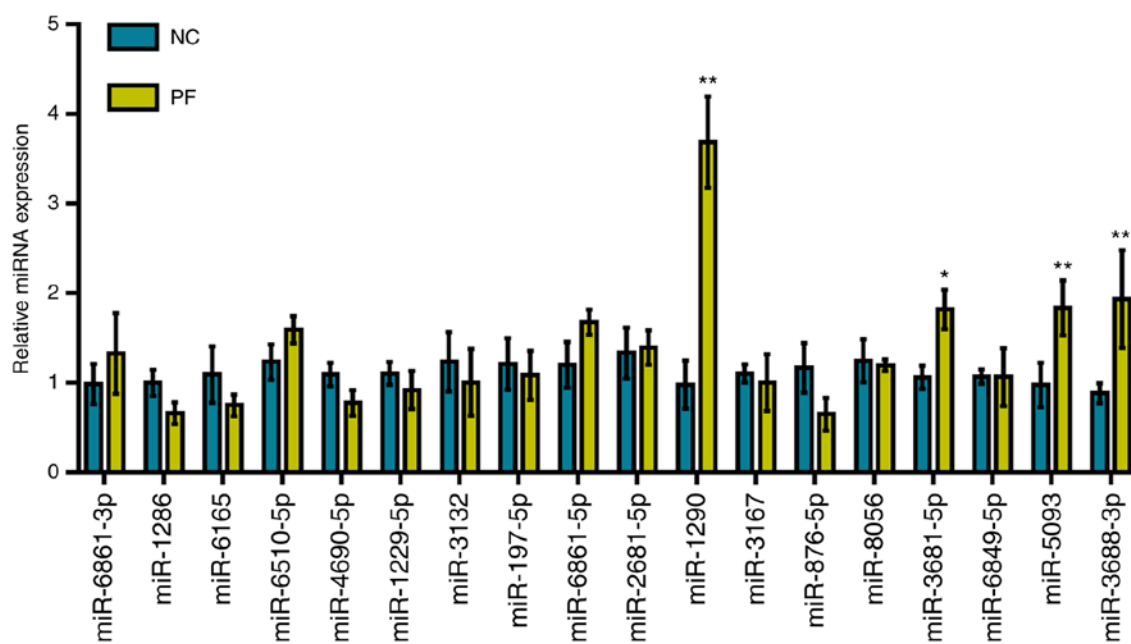

Figure S2. Effect of miR-1290 on human normal lung epithelial cell (BEAS-2B) proliferation. (A) miR-1290 overexpression and inhibition were achieved in BEAS-2B cells by transfection of miR-1290 mimics or inhibitor, as confirmed by RT-qPCR. (B) Viability of BEAS-2B cells in which miR-1290 was overexpressed or inhibited was determined by MTT assays. \*\*P<0.01, compared to NC (negative control) inhibitor group; ##P<0.01 compared to the NC (negative control) mimics group.

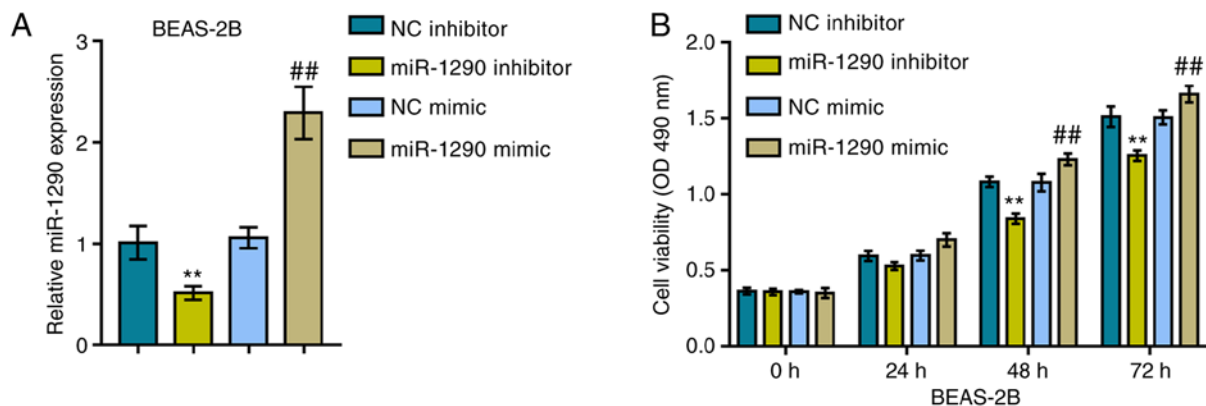

Table SI. Primer sequences.

| Name                    | Forward (5'-3')                                                                        | Reverse (5'-3')                                      |
|-------------------------|----------------------------------------------------------------------------------------|------------------------------------------------------|
| miR-1290 mimics         | UGGAUUUUUGGAUCAGGGA                                                                    | CCUGAUCCAAAAAUCCAUU                                  |
| miR-1290 inhibitor      | UCCCUGAUCCAAAAUCCA                                                                     |                                                      |
| NC mimics               | UUCUCCGAACGUGUCACGUTT                                                                  | ACGUGACACGUUCGGAGAATT                                |
| NC inhibitor            | CAGUACUUUUGUGUAGUACAA                                                                  |                                                      |
| si-Napsin A             | CGAUGGAUGUACUGGUGGATT                                                                  | UCCACCAGUACAUCAUCGTT                                 |
| si-NC                   | UUCUCCGAACGUGUCACGUTT                                                                  | ACGUGACACGUUCGGAGAATT                                |
| CREB1 overexpression    | CGCGGATCCATGACCATGGAATCTG GAGCC                                                        | CCGGAATTCTTACAATTTTTGAGTA<br>CCTTGAACA               |
| Qpcr miR-1290           | RT: GTCGTATCCAGTGCGTGTCGTGGAGTCG<br>GCAATTGCACTGGATACGACTCCCTG<br>F: GCCGTGGATTTTTGGAT | CAGTGCGTGTCGTGGA                                     |
| U6                      | CTCGCTTCGGCAGCACA                                                                      | AACGCTTCACGAATTTGCGT                                 |
| Napsin A                | CTGGTTACACCACCGATTTGA                                                                  | CCACCAATAGTCAGCTTGTCC                                |
| GAPDH                   | ACAGCCTCAAGATCATCAGC                                                                   | GGTCATGAGTCCTTCCACGAT                                |
| Wt-napsin A 3'UTR       | CCGCTCGAGTACTCGAAATGGCGTCCG                                                            | ATTTGCGGCCGC<br>TCAATGGAAATAGTGGATTTTTACT            |
| Mut-napsin A            | CCGCTCGAGTACTCGAAATGGCGTCCG                                                            | ATTTGCGGCCGCTCAATGGAAATA<br>GTCCTAAAATACTGGGTAGCAGGA |
| Psicheck-2-pro-miR-1290 | GGGTTTAAACGATTGGAAATCACTTGCCCG                                                         | ATTTGCGGCCGCTCCAGCTCCGA<br>GGGGTTT                   |
